# Supplementary material for: Aminated Polyethylene Terephthalate (PET) Nanofibers for the Selective Removal of Pb(II) from Polluted Water
Source: MDPI journal article supplement (doi:10.3390/ma10121352), 2017-11-24
Supplement: s1 [file s1]

# Aminated Polyethylene Terephthalate (PET) Nanofibers for the Selective Removal of Pb(II) from Polluted Water

Diego Morillo Martín <sup>1</sup>, Mohamed Ahmed <sup>1</sup>, Mónica Rodríguez <sup>2</sup>, María A. García <sup>2</sup> and Mirko Faccini <sup>1,\*</sup>

**Supplementary Materials:** The following are available online at [www.mdpi.com/link](http://www.mdpi.com/link), Figure S1: APET cartridge drawing for continuous adsorption experiments. Figure S2. Functionalization degree of PET nanofiber at room temperature. Figure S3. Kaiser Test results of blank PET and APET nanofiber mats.

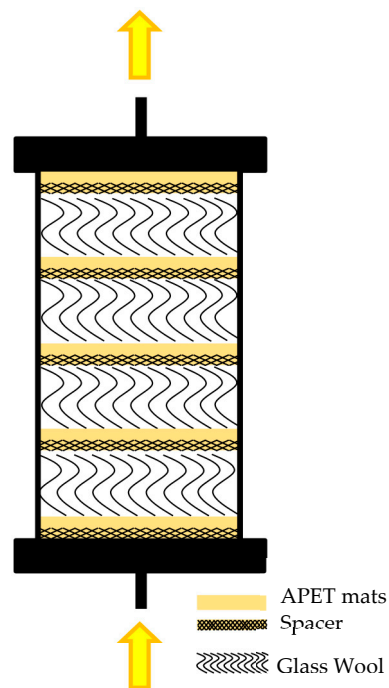

**Figure S1.** APET cartridge drawing for continuous adsorption experiments

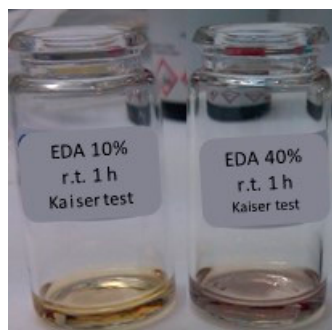

**Figure S2.** Functionalization degree of PET nanofiber at room temperature

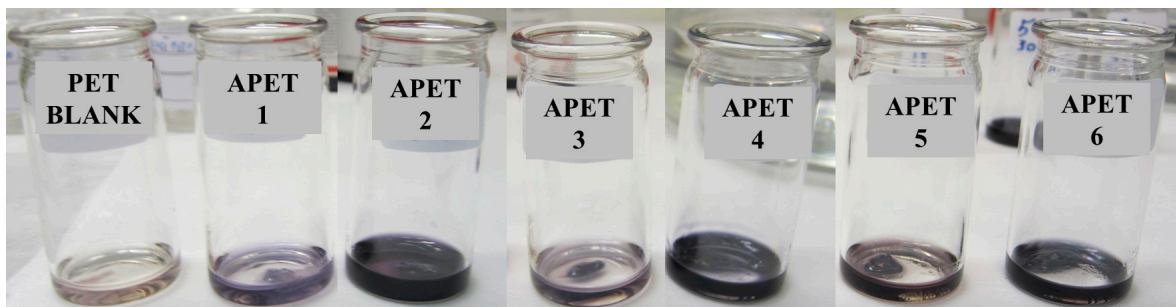

Figure S3. Kaiser Test results of blank PET and APET nanofiber mats
